# Supplementary material for: A conserved mechanism of sirtuin signalling through steroid hormone receptors
Source: Oxford University Press journal article supplement (doi:10.1042/bsr20193535), 2019-11-20
Supplement: bsr-2019-3535_supp.pdf [file bsr-2019-3535_supp.pdf]

# **A conserved mechanism of sirtuin signalling through steroid hormone receptors**

Henry K. Bayele

Department of Structural and Molecular Biology, Division of Biosciences, University College  
London, Darwin Building, Gower Street, London WC1E 6BT, United Kingdom

Correspondence:

Email: [h.bayele@ucl.ac.uk](mailto:h.bayele@ucl.ac.uk)

Tel: +44 207 6792454

Fax: +44 207 6797193

## Supplementary Figures

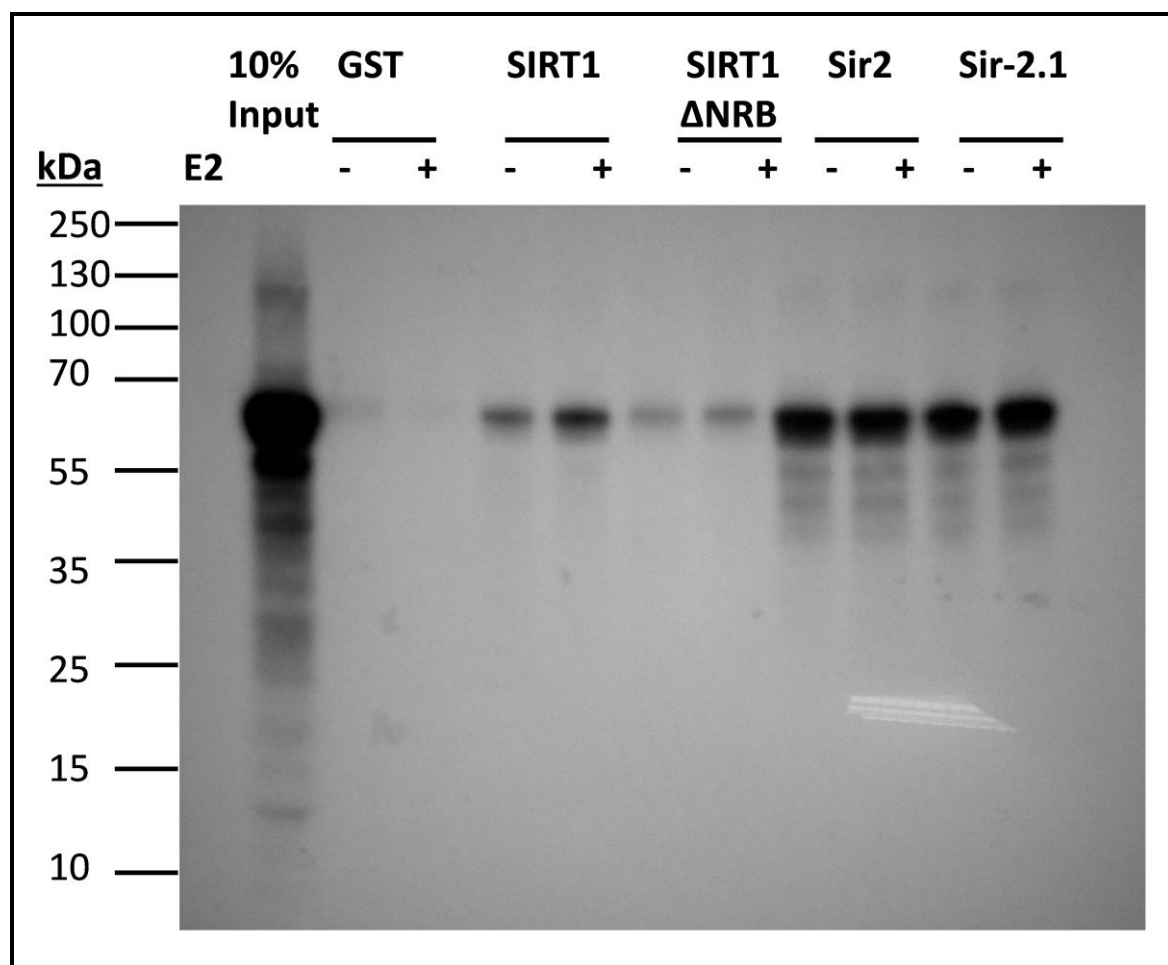

**Figure S1. Assay of sirtuin interaction with ER $\alpha$ .** Complete fluorograph of **Figure 5b** (upper panel). *In vitro* expressed ER $\alpha$  was bound to GST or GST-tagged SIRT1 (wt or NR-box mutant,  $\Delta$ NRB), Sir-2.1 and Sir2 in the presence of DMSO (-) or 1  $\mu$ M E2 to detect ligand-independent and ligand-dependent interaction respectively. Bound complexes were co-resolved with “Input” ER $\alpha$  and subjected to fluorographic detection; positions of molecular weight markers shown.

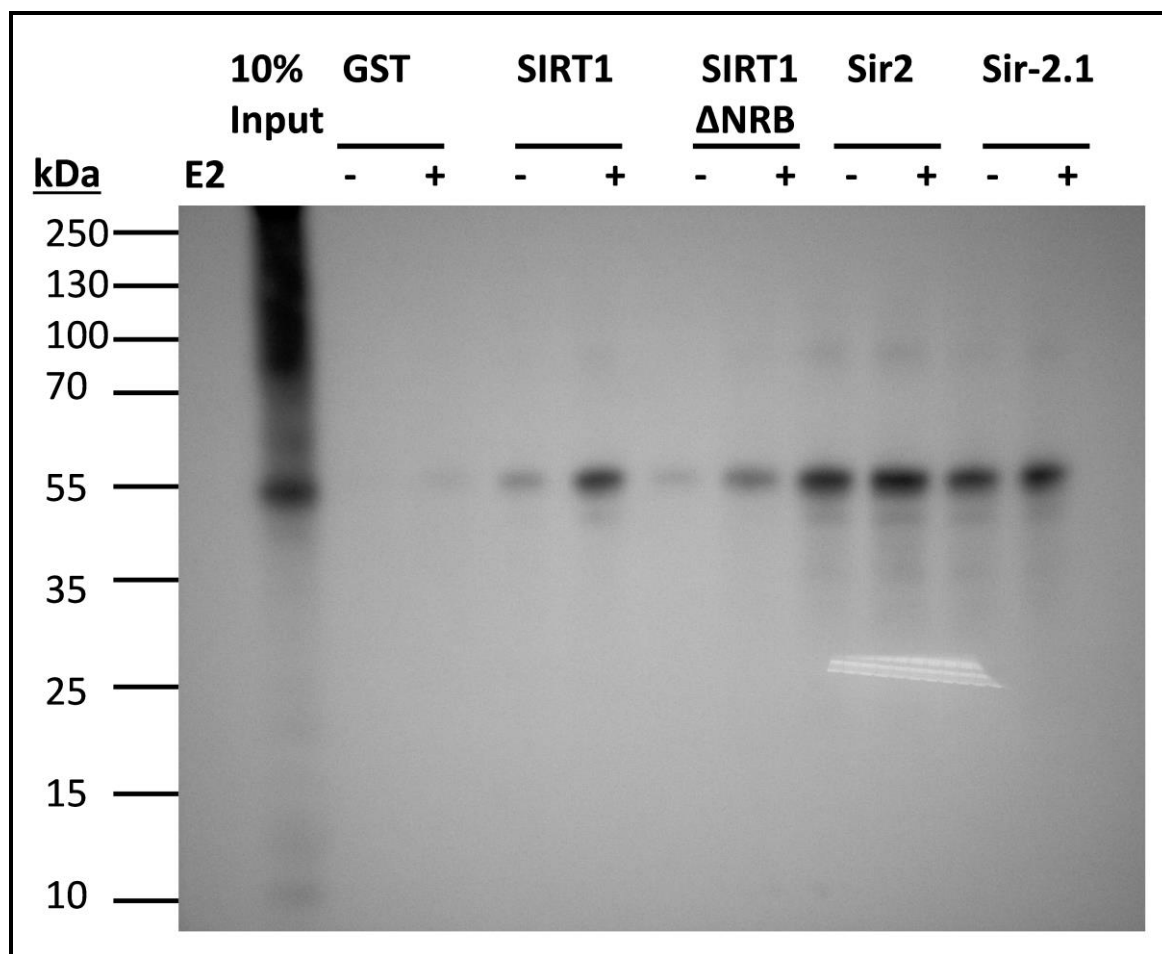

**Figure S2. Interaction between sirtuins and ER $\beta$ .** Full, uncropped fluorograph of **Figure 5b** (lower panel). *In vitro* expressed ER $\beta$  was bound to GST or GST-tagged SIRT1 (wt or NR-box mutant,  $\Delta$ NRB), Sir-2.1 and Sir2 in the presence of DMSO (-) or 1  $\mu$ M E2 to detect ligand-independent and ligand-dependent interaction respectively. Bound complexes were co-resolved with “Input” ER $\beta$  and subjected to fluorographic detection

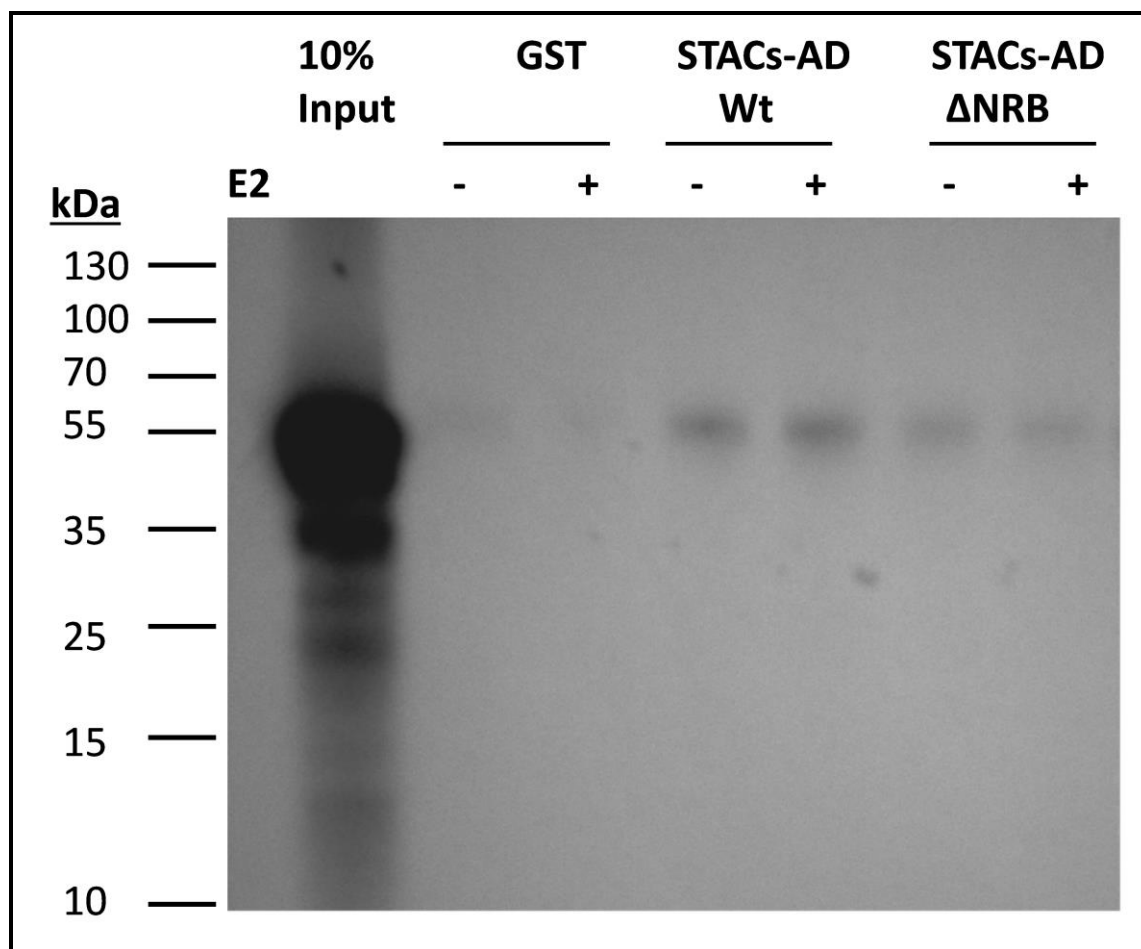

**Figure S3. STACs-AD interaction with ER $\alpha$ .** Uncropped fluorograph of **Figure 5d** (upper panel). *In vitro* expressed ER $\alpha$  was bound to GST or GST-tagged STACs-AD wt or its NR-box mutant ( $\Delta$ NRB); DMSO (-) or 1  $\mu$ M E2 were added to determine ligand-independent or ligand-dependent interaction respectively. Complexes were co-resolved with “Input” ER $\alpha$ .

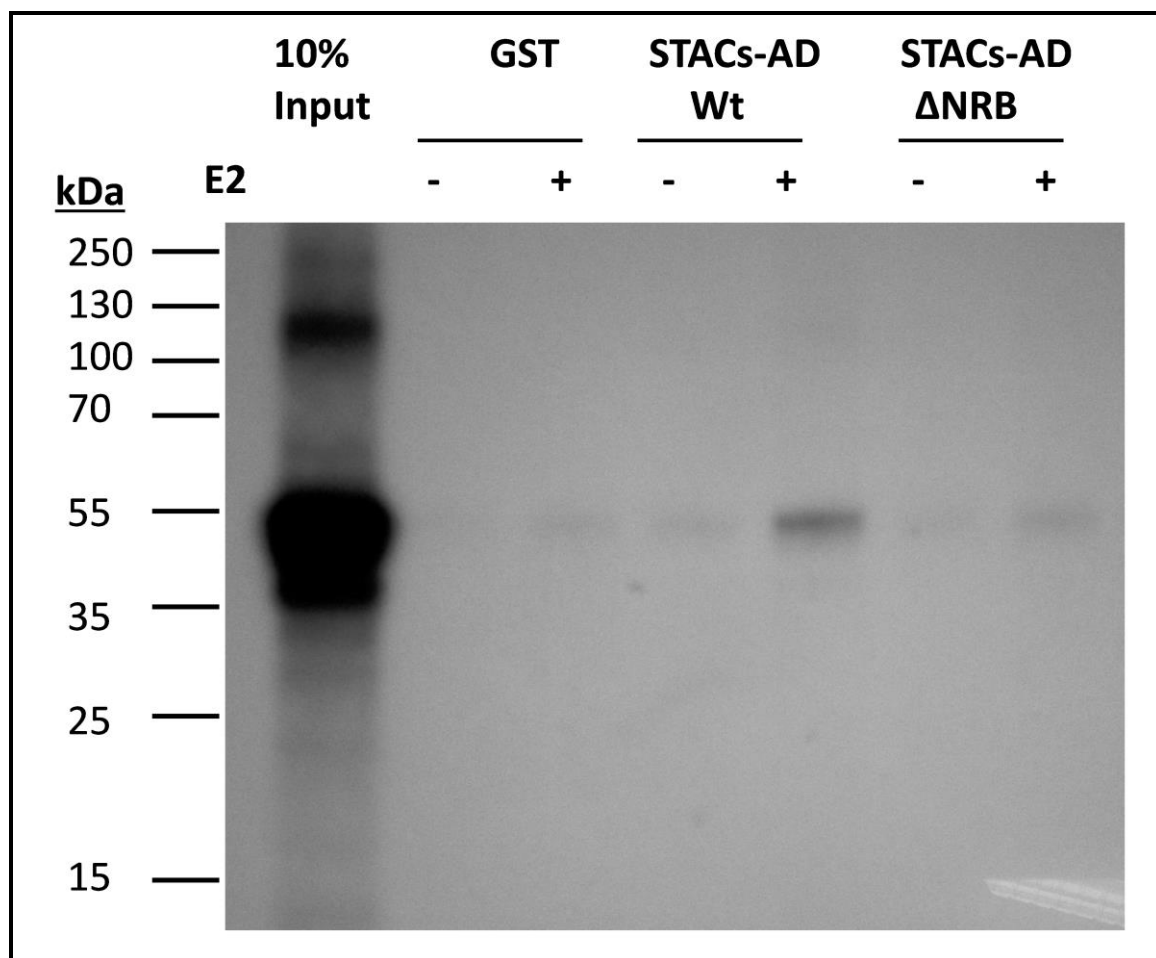

**Figure S4. STACs-AD interaction with ER $\beta$ .** Uncropped fluorograph of Figure 5d (lower panel). *In vitro* expressed ER $\beta$  was bound to GST or GST-tagged STACs-AD wt or its NR-box mutant ( $\Delta$ NRB); DMSO (-) or 1  $\mu$ M E2 were added to determine ligand-independent or ligand-dependent interaction respectively. Complexes were co-resolved with “Input” ER $\beta$ .

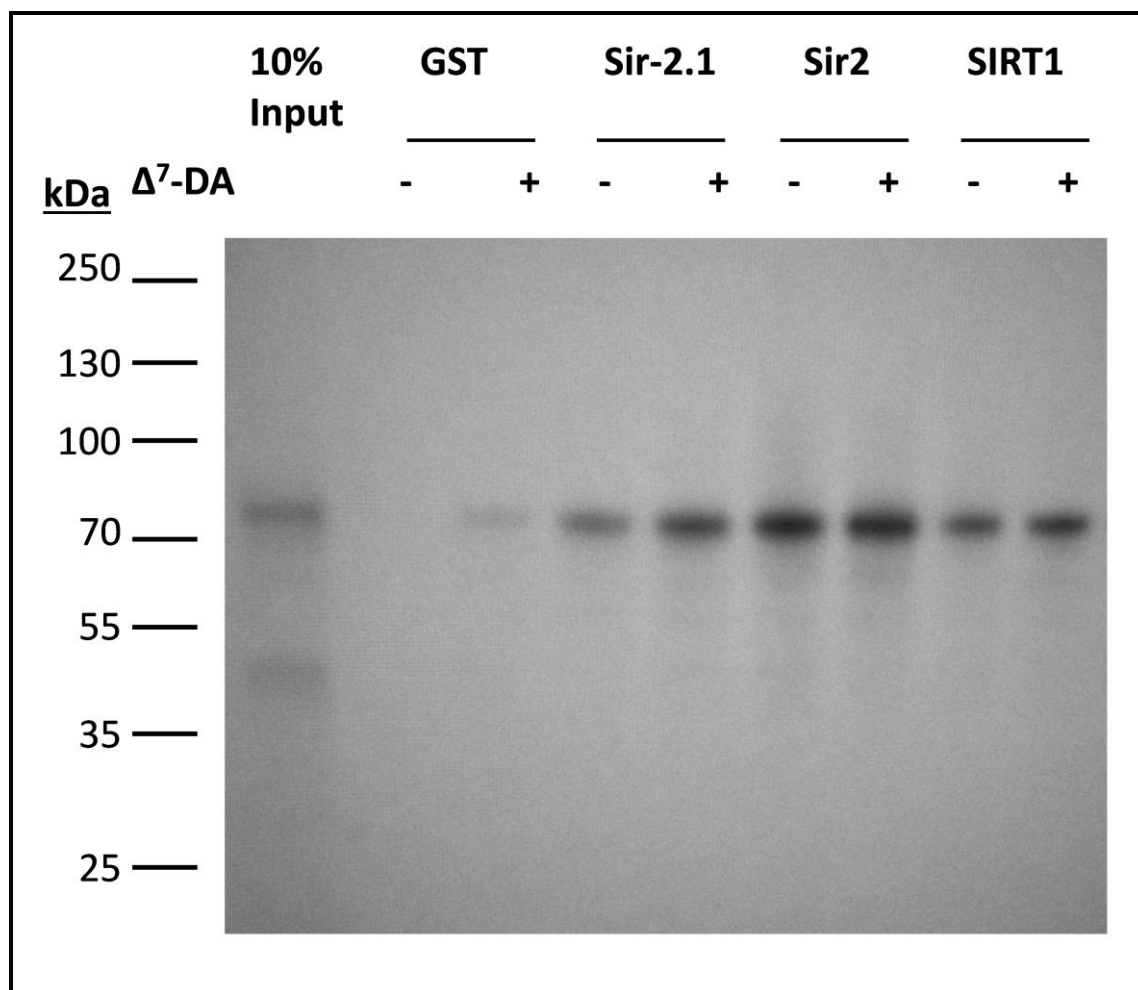

**Figure S5. DAF-12 interaction with sirtuins.** Fluorograph of **Figure 5e** (uncropped). *In vitro* expressed DAF-12 was bound to GST or GST-tagged Sir-2.1, Sir2 and SIRT1 (wt only) in the presence of DMSO (-) or 1  $\mu$ M  $\Delta^7$ -dafachronic acid (DA) to determine ligand-independent or ligand-dependent interaction respectively. Complexes were co-resolved with “Input” DAF-12.
